# Supplementary material
Source: MDPI journal article supplement (https://www.mdpi.com/2073-4344/12/2/133)
Supplement: s1 [file s1]

# \*\*\*Supplementary Materials\*\*\*

## Effect of Water and Formic acid on OH+CH<sub>4</sub> Reaction :An Ab Initio/DFT study

---

Mohamad Akbar Ali <sup>1,\*</sup> and Balaganesh Muthiah <sup>2</sup>

<sup>1</sup> Department of Chemistry, College of Science, King Faisal University, Al-Ahsa 31982, Saudi Arabia

<sup>2</sup> Department of Chemistry, National Taiwan University, Taipei 10617, Taiwan

\*corresponding author: aamohamad@kfu.edu.sa

### Table of Contents

|                                                                                                                                                                                                                                                                                |                |
|--------------------------------------------------------------------------------------------------------------------------------------------------------------------------------------------------------------------------------------------------------------------------------|----------------|
| <b>Table S1:</b> Optimized geometries of reactants, complexes, products and transition states obtained using M06-2X/6-311++G(3df,3pd).....                                                                                                                                     | <b>Page 2</b>  |
| <b>Table S2:</b> Rotational -vibrational parameters obtained from vibrational analysis.....                                                                                                                                                                                    | <b>Page 9</b>  |
| <b>Table S3:</b> Electronic Energies ( E <sub>0</sub> ), Zero-point correction (ZPE), Thermal Correction (E <sub>T</sub> ), Thermal Correction to Enthalpy (H <sub>T</sub> ),Free energy correction (G), Entropy (cal/mol-K) of all the species involved in the reactions..... | <b>Page 10</b> |
| <b>Table S4:</b> Calculated <i>CVT</i> unimolecular rate constant ( <i>k</i> <sub>2</sub> in s <sup>-1</sup> ).....                                                                                                                                                            | <b>Page 12</b> |
| <b>Table S5:</b> Calculated equilibrium constants ( <i>K</i> <sub>eq</sub> in cm <sup>3</sup> molecule <sup>-1</sup> ) for the formation of two-body complexes .....                                                                                                           | <b>Page 12</b> |
| <b>Table S6:</b> Calculated equilibrium constants ( <i>K</i> <sub>eq</sub> in cm <sup>3</sup> molecule <sup>-1</sup> ) for the formation of three-body complex.....                                                                                                            | <b>Page 12</b> |
| <b>Figure S1.</b> Three body complexes for the effect of FA/H <sub>2</sub> O on OH+CH <sub>4</sub> reaction....                                                                                                                                                                | <b>Page 13</b> |
| <b>Figure S2.</b> Free energy profiles for the CH <sub>4</sub> +OH (____), CH <sub>4</sub> +OH+H <sub>2</sub> O (____) and CH <sub>4</sub> +OH.<br>+HCOOH (____) reactions.....                                                                                                | <b>Page 14</b> |

**Table S1:** Redundant internal coordinates of reactants, complexes, products and transition states obtained using M06-2X/6-311++G(3df,3pd) taken from gaussian checkpoint file.

**(a) CH<sub>4</sub> + OH==> CH<sub>3</sub> + H<sub>2</sub>O**

**CH<sub>4</sub>**

Charge = 0 Multiplicity = 1

C,0,-0.337477789,-0.523978723,0.  
H,0,0.0246335578,-1.5482237771,-0.0000008724  
H,0,0.0246528899,-0.0118632827,0.8870184359  
H,0,0.0246514653,-0.0118622754,-0.8870184359  
H,0,-1.4238490691,-0.5239655568,0.0000008724

**OH**

Charge = 0 Multiplicity = 2

O,0,0.810535131,0.88541678,0.  
H,0,1.781409489,0.88541678,0.

**RC<sub>1</sub>**

Charge = 0 Multiplicity = 2

C,0,-0.0716501175,-0.1373135994,0.1048992586  
H,0,0.5407457641,0.5051417438,0.7329206314  
H,0,-0.8958317822,-0.5345528544,0.6908068576  
H,0,-0.4662033757,0.4395912865,-0.7279848883  
H,0,0.5266768832,-0.9648556735,-0.2703759148  
O,0,1.7404026462,1.7890540302,-1.2304861072  
H,0,2.015270442,0.8697317268,-1.3785266373

**TS**

Charge = 0 Multiplicity = 2

H,0,-1.7166476928,0.973299368,-0.0306501525  
C,0,-1.3130425097,-0.0333870269,-0.0009414347  
H,0,-0.13537831,0.1170911133,-0.0089439299  
H,0,-1.5690075288,-0.6060915651,-0.885357394  
H,0,-1.5638478656,-0.5507791483,0.9183512088  
O,0,1.2155332824,0.0844365949,-0.0114930261  
H,0,1.3265036245,-0.8775163358,0.0181407284

**Post-RC**

Charge = 0 Multiplicity = 2

H,0,1.637983879,1.0522484011,-0.07432975  
C,0,1.6175631533,-0.0230500733,-0.0167815204  
H,0,-0.7258543326,0.0572501213,0.1326126645  
H,0,1.7255455433,-0.5083935423,0.9386813072  
H,0,1.6673342409,-0.6054328218,-0.9214328674  
O,0,-1.6868024427,0.0724441391,0.1807524576  
H,0,-1.9674607612,-0.7421292841,-0.2395091415

### CH<sub>3</sub>

Charge = 0 Multiplicity = 2

C,0,-0.0219175165,0.9324605817,0.0000494797  
H,0,0.4855755461,1.1121142883,0.9320053078  
H,0,0.4855264844,1.1120957527,-0.9320080402  
H,0,-1.0366245116,0.5739610957,-0.0000467472

### H<sub>2</sub>O

Charge = 0 Multiplicity = 1

O,0,-1.4346366202,0.2446432413,0.01863449  
H,0,-0.4767523973,0.2816161171,0.01863449  
H,0,-1.7195327818,1.1599264517,0.01863449

**Table S1:** Redundant internal coordinates of complexes, post products and transition states obtained using M06-2X/6-311++G(3df,3pd) taken from gaussian checkpoint file.

### (b) CH<sub>4</sub> + OH + (HCOOH) ==> CH<sub>3</sub> + H<sub>2</sub>O + HCOOH

#### HCOOH-1

Charge = 0 Multiplicity = 1

C,0,-1.4446753947,-0.4817068094,0.  
H,0,-2.536423369,-0.5621299045,0.  
O,0,-0.894144081,-1.6990326503,0.  
O,0,-0.8343335076,0.5413536227,0.  
H,0,0.0665675323,-1.5883758085,0.

#### HCOOH-2

Charge = 0 Multiplicity = 1

C,0,-1.4531097868,-0.4963886076,0.  
H,0,-2.5475832312,-0.6147511195,0.  
O,0,-0.7832273307,-1.6601967899,0.  
O,0,-0.9039507257,0.5534327929,0.  
H,0,-1.3967814657,-2.4005186959,0.

#### OH---HCOOH-1

Charge = 0 Multiplicity = 2

O,0,1.1617552669,0.1249418511,0.1787037385  
O,0,-1.0479956695,1.8587363147,-0.2397184094  
H,0,-0.2842454132,2.4282721811,0.0000694125  
C,0,1.9493365655,1.146814571,0.4614422996  
H,0,2.9640450272,0.8091518273,0.6909625909

O,0,1.6181154057,2.3025044491,0.4716861663  
H,0,0.2644770473,0.4585028658,-0.0214127185

### OH---HCOOH-2

Charge = 0 Multiplicity = 2

O,0,1.1793650718,0.1402906507,0.2319681998  
H,0,1.6328904259,-0.7067053976,0.2818220975  
O,0,-1.2026580441,2.071465149,-0.1872761081  
H,0,-0.294510862,2.3498545083,0.0363771205  
C,0,2.0105392977,1.1524667035,0.4845706492  
H,0,3.0454611172,0.8555724817,0.7011546424  
O,0,1.6430026535,2.2848451245,0.4722450086  
H,0,-1.2838319403,0.4443714859,-0.031276744  
H,0,-2.4812335201,0.1444157908,-1.0996767646  
N,0,-2.0325573431,-0.2022275385,-0.2608616072  
H,0,-2.7177333793,-0.1432299156,0.4822090913

### PRC<sub>FA-1</sub>

Charge = 0 Multiplicity = 2

C,0,2.1147924898,-1.1312752165,0.4789440791  
H,0,2.7270803315,-1.8882838527,0.961722122  
H,0,2.7427061954,-0.2871950165,0.2009626637  
H,0,1.6577615592,-1.5530493249,-0.4128853895  
H,0,1.3400944252,-0.8044798998,1.1695410737  
O,0,1.1030125391,1.3740118221,-0.6079541022  
H,0,0.6091034226,1.3273760776,0.2392420266  
O,0,-0.9779950942,-0.4978359341,-1.0246431308  
H,0,-0.1910949471,0.0707856312,-1.1501597086  
C,0,-1.4551098672,-0.308374656,0.1916271501  
H,0,-2.3380911391,-0.9290852546,0.3701345268  
O,0,-0.9968139151,0.4410566242,1.0129806891

### PRC<sub>FA-2</sub>

Charge = 0 Multiplicity = 2

C,0,1.4432056513,1.3285733255,-2.1169538233  
H,0,1.8015557103,0.970394673,-3.0788348483  
H,0,1.7970993403,2.3420693603,-1.9475290958  
H,0,0.3555962478,1.3273588186,-2.106873334  
H,0,1.8166962131,0.6847926926,-1.3241876471  
O,0,0.3377925416,2.8135403039,0.1768491282  
H,0,0.2152985749,1.8669645346,0.3845680009  
O,0,-1.6477060071,-0.0570493604,-0.8436483771  
C,0,-0.8131607436,-0.6630622137,0.0013552966  
H,0,-0.905409454,-1.756969149,0.0323531471  
O,0,-0.033668851,-0.0551935616,0.6651703252  
H,0,-2.2019363746,-0.6966403891,-1.3015763753

### TS1<sub>FA1</sub>

Charge = 0 Multiplicity = 2

C,0,1.1450680881,-0.9042889436,0.230780792  
H,0,2.19846656,-0.8843384777,0.4897565299  
H,0,0.9271573863,0.131872409,-0.2809039191  
H,0,0.9115123993,-1.6571825177,-0.514993685  
H,0,0.5015419507,-0.9722610705,1.1012285774  
O,0,0.318131222,1.3053997405,-0.7117885421  
H,0,-0.2018961708,1.4427923729,0.1040203976  
O,0,-1.9146830953,-0.1845079577,-1.2918319398  
H,0,-1.0816892709,0.340699979,-1.3164033068  
C,0,-2.431395113,-0.0962539163,-0.0808806972  
H,0,-3.361437723,-0.6685712218,-0.0052463296  
O,0,-1.9614386035,0.5229630739,0.8364194728

### **TS2<sub>FA2</sub>**

Charge = 0 Multiplicity = 2

C,0,-2.2673651778,-0.8421338,0.3213972464  
H,0,-2.1689927717,-1.1645571381,-0.7094140695  
H,0,-1.6117332227,0.1567411201,0.4372560001  
H,0,-3.2825635633,-0.5526501999,0.5713820701  
H,0,-1.8456981531,-1.5561737374,1.0200500362  
O,0,-0.7875840084,1.178802288,0.3124007284  
H,0,-0.3704959584,0.8795941755,-0.5140134565  
O,0,0.7431744921,-1.8646223252,-0.685920601  
C,0,0.9453835554,-1.2084100793,-1.8311137825  
H,0,1.6134490743,-1.7204303923,-2.5375777592  
O,0,0.4357530076,-0.1578206151,-2.0577966873  
H,0,1.2422897259,-2.6869342962,-0.6691137254

### **Post-PRC<sub>FA-1</sub>**

Charge = 0 Multiplicity = 2

C,0,1.9909191959,-1.3504694931,0.6228580972  
H,0,3.066688296,-1.2878578936,0.6218877983  
H,0,1.9200551224,1.042398512,-0.4877079479  
H,0,1.4867324193,-1.8498364341,-0.1879379896  
H,0,1.4371572908,-1.0733161377,1.5041568965  
O,0,1.0705629504,1.4789183555,-0.5997531355  
H,0,0.6437965273,1.4118723763,0.2679213942  
O,0,-0.8839341734,-0.3155281657,-1.1091752917  
H,0,-0.1275434117,0.3194500538,-1.1492495821  
C,0,-1.3546274097,-0.3293253974,0.1215039047

H,0,-2.1968069344,-1.0225329234,0.2170392763  
O,0,-0.9314138729,0.3219461473,1.0407305797

**Post-PRC<sub>FA-2</sub>**

C,0,-1.8283023568,1.2425333841,0.7330823144  
H,0,-1.1102043415,1.9415524338,0.3357167023  
H,0,-1.367204111,-0.2688808918,-1.0705284701  
H,0,-1.5898961092,0.7018587863,1.6344209642  
H,0,-2.8504580413,1.2755611491,0.3911734181  
O,0,-0.6400295025,-0.5422341898,-1.641324359  
H,0,-0.8594120825,-1.4136226333,-1.9757742741  
O,0,1.4015132171,0.7575019949,-0.3265141504  
C,0,1.2982770885,0.1744997767,0.8651848172  
H,0,0.6841430639,-0.7404695851,0.8508754212  
O,0,1.8141518817,0.5972720372,1.8512487829  
H,0,0.8440952937,0.276564738,-0.9622361666

**Table S1:** Redundant internal coordinates of complexes, post products and transition states obtained using M06-2X/6-311++G(3df,3pd) taken from gaussian checkpoint file.

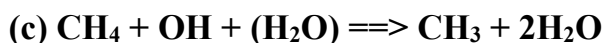

**HO---H<sub>2</sub>O**

Charge = 0 Multiplicity = 2

Charge = 0 Multiplicity = 2

O,0,-0.0867222707,0.0638158913,-0.0625109564  
H,0,-0.0855411999,0.0669486052,0.8968432747  
H,0,0.8353560523,0.0855566692,-0.3264631354  
O,0,-1.9094150871,1.8252379147,-1.4087937283  
H,0,-1.3084124014,1.1943728933,-0.9653882769

**PRCw-1**

C,0,2.2484316441,-0.5220585519,-0.0061850482  
H,0,2.3765059964,0.1421786807,-0.8595746331  
H,0,3.0500875493,-1.2547356163,-0.0155222189  
H,0,2.3043343056,0.0444851729,0.9216746985  
H,0,1.2902947498,-1.0327039644,-0.0713708845  
O,0,-0.3517449646,1.3712543188,0.2122806271  
H,0,-0.5935975177,2.1189631172,-0.3377601546  
H,0,0.5848807633,1.218133304,0.0581279986  
O,0,-1.391270053,-1.250911728,-0.1447115122  
H,0,-1.1581754732,-0.3145827331,0.0211291273

**PRCw-2**

Charge = 0 Multiplicity = 2

C,0,-3.419129772,-0.3546597595,0.2043304016  
H,0,-2.9836336668,-0.8714642927,1.0577786461  
H,0,-3.4338723369,0.7205211588,0.3768062118  
H,0,-2.8532881171,-0.5778363263,-0.6988276717  
H,0,-4.4411485696,-0.6954218709,0.0653718696  
O,0,-0.319480255,0.5269187315,0.8620309038  
H,0,-1.2326529918,0.3724367267,0.5577154238  
O,0,-1.1859344226,-1.6279235966,2.5732806783  
H,0,-0.5606980052,-0.9794652143,2.2319710341  
H,0,-0.7229185732,-2.1053990166,3.2627997824

**TSaw**

Charge = 0 Multiplicity = 2

C,0,-0.108437038,-0.6352602796,0.1441548721  
H,0,-0.4480360387,-1.6652162887,0.1012610916  
H,0,0.1866284946,-0.4558715031,1.2587385702  
H,0,0.7984797798,-0.4638136722,-0.4255432309  
H,0,-0.8974679715,0.065160511,-0.1081583062

O,0,0.6161947303,0.0667958023,2.5053101237  
H,0,0.1255417568,0.9018860923,2.4525817142  
O,0,2.8966677846,0.5194812835,0.76354131  
H,0,2.2919343007,0.353937333,1.4978917452  
H,0,3.7773214514,0.4654885314,1.13637446

### **Post-PRCw**

C,0,1.6297069173,-1.2888643458,0.0001583833  
H,0,2.1695310693,-1.2693935131,-0.9327342875  
H,0,0.9111338027,0.9054884768,-0.1010501211  
H,0,0.5704110967,-1.4943233815,0.0060334282  
H,0,2.1835685237,-1.2936843687,0.9247829629  
O,0,0.232727829,1.5924198271,-0.0877854395  
H,0,0.3691264427,2.0665195875,0.735208413  
O,0,-1.6529328714,-0.5381404259,0.0990028102  
H,0,-1.1974710941,0.3077159661,-0.0137310518  
H,0,-2.4932627159,-0.4450028226,-0.3510140978



**Table S2 (a):** Rotational (GHZ) -vibrational ( $\text{cm}^{-1}$ ) parameters obtained from vibrational analysis.

| Rot-GHZ   | OH       | H2O      | OH--H2O  | HCOOH-1  | HCOOH-2  | OH--HCOOH-1 | OH--HCOOH-2 |
|-----------|----------|----------|----------|----------|----------|-------------|-------------|
|           | 3767.4   | 1633.0   | 121.1    | 650.2    | 516.6    | 168.1       | 44.8        |
|           |          | 3888.9   | 149.0    | 676.1    | 678.4    | 187.4       | 55.0        |
|           |          | 3992.1   | 198.0    | 1071.6   | 1050.9   | 207.6       | 163.7       |
|           |          |          | 400.8    | 1165.6   | 1143.8   | 439.1       | 406.2       |
|           |          |          | 620.8    | 1323.3   | 1295.5   | 641.4       | 486.8       |
|           |          |          | 1619.2   | 1409.0   | 1436.9   | 701.8       | 517.8       |
|           |          |          | 3659.5   | 1874.2   | 1927.2   | 767.0       | 690.2       |
|           |          |          | 3880.7   | 3119.5   | 3058.9   | 1081.0      | 1057.9      |
|           |          |          | 3980.9   | 3808.9   | 3896.5   | 1230.8      | 1157.4      |
|           |          |          |          |          |          | 1384.8      | 1291.2      |
|           |          |          |          |          |          | 1432.9      | 1438.7      |
|           |          |          |          |          |          | 1831.9      | 1900.5      |
|           |          |          |          |          |          | 3128.4      | 3072.6      |
|           |          |          |          |          |          | 3561.0      | 3689.6      |
|           |          |          |          |          |          | 3621.5      | 3887.0      |
| K-rotor   |          | 833.2896 | 357.7404 | 78.21913 | 88.12876 | 12.04534    | 11.98386    |
| 2D1-rotor |          | 434.6283 | 6.90608  | 12.23954 | 11.83197 | 5.14977     | 4.34726     |
| 2D2-rotor |          | 285.6425 | 6.81752  | 10.43146 | 1.91211  | 3.60746     | 3.19004     |
| 2D-rotor  | 565.5135 | 352.3469 | 6.861657 | 11.10967 | 2.089529 | 3.96012204  | 2.709395569 |

**Table S2 (b):** Rotational (GHZ) -vibrational ( $\text{cm}^{-1}$ ) parameters obtained from vibrational analysis.

| PRCFA1 | PRCFA2 | TS1FA-1 | TS2FA-2 | Post-PRCFA1 | PostPRCF A2 | RC     | TSw    | Post-PRCw |
|--------|--------|---------|---------|-------------|-------------|--------|--------|-----------|
| 47.2   | 34.6   | -827.2  | -1204.5 | 45.3        | 45.4        | 67.7   | -732.1 | 99.3      |
| 64.7   | 54.3   | 42.0    | 25.8    | 66.7        | 75.6        | 88.9   | 69.1   | 100.3     |
| 96.7   | 55.9   | 61.7    | 49.7    | 123.5       | 98.8        | 105.6  | 102.1  | 146.9     |
| 116.8  | 78.6   | 80.2    | 52.1    | 141.5       | 134.5       | 116.3  | 159.9  | 166.3     |
| 146.6  | 95.4   | 177.6   | 74.3    | 174.9       | 172.6       | 141.1  | 175.7  | 196.4     |
| 175.5  | 125.2  | 204.9   | 97.1    | 191.5       | 181.4       | 155.0  | 213.2  | 220.1     |
| 198.1  | 159.4  | 210.6   | 157.0   | 218.0       | 205.8       | 185.3  | 284.2  | 244.8     |
| 206.6  | 166.3  | 327.6   | 307.8   | 227.5       | 213.8       | 208.2  | 319.7  | 268.9     |
| 212.6  | 175.6  | 339.5   | 360.1   | 258.0       | 231.1       | 212.5  | 399.9  | 281.2     |
| 509.6  | 475.0  | 590.1   | 467.0   | 291.7       | 287.9       | 399.3  | 570.2  | 325.8     |
| 627.1  | 479.8  | 709.6   | 532.9   | 405.6       | 329.6       | 461.0  | 822.4  | 495.9     |
| 703.6  | 516.7  | 887.9   | 686.5   | 563.4       | 385.0       | 1338.6 | 1074.8 | 623.9     |
| 836.6  | 688.9  | 914.0   | 783.9   | 633.4       | 660.6       | 1351.2 | 1252.3 | 663.9     |
| 1083.2 | 1061.7 | 1056.5  | 974.1   | 721.2       | 694.9       | 1355.1 | 1340.6 | 1410.3    |
| 1235.0 | 1163.1 | 1098.3  | 1063.9  | 962.7       | 840.8       | 1572.6 | 1458.8 | 1432.6    |
| 1337.0 | 1296.7 | 1243.7  | 1158.9  | 1086.5      | 1075.1      | 1577.5 | 1472.9 | 1623.0    |

|                 |                 |               |              |                |           |             |              |               |
|-----------------|-----------------|---------------|--------------|----------------|-----------|-------------|--------------|---------------|
| 1345.3          | 1335.4          | 1248.2        | 1198.3       | 1255.7         | 1197.1    | 1623.6      | 1523.0       | 1635.1        |
| 1349.6          | 1343.1          | 1336.0        | 1278.2       | 1406.9         | 1381.5    | 3023.7      | 1638.8       | 3116.2        |
| 1388.5          | 1354.3          | 1402.7        | 1296.9       | 1411.3         | 1413.8    | 3133.3      | 3075.2       | 3289.0        |
| 1434.5          | 1434.4          | 1439.0        | 1388.0       | 1425.3         | 1432.3    | 3143.4      | 3189.1       | 3304.5        |
| 1563.6          | 1564.4          | 1454.1        | 1437.8       | 1466.5         | 1440.5    | 3152.1      | 3207.2       | 3752.2        |
| 1572.1          | 1568.7          | 1474.7        | 1464.7       | 1639.9         | 1607.4    | 3732.7      | 3790.3       | 3802.3        |
| 1829.5          | 1896.4          | 1509.8        | 1479.8       | 1827.1         | 1905.0    | 3843.1      | 3807.6       | 3953.1        |
| 3036.7          | 3051.1          | 1832.5        | 1904.8       | 3115.7         | 3023.8    | 3981.1      | 3970.6       | 3970.6        |
| 3144.7          | 3052.1          | 3080.5        | 3071.7       | 3132.2         | 3128.6    |             |              |               |
| 3149.3          | 3162.2          | 3120.4        | 3076.3       | 3304.6         | 3299.3    |             |              |               |
| 3150.7          | 3164.4          | 3200.7        | 3189.2       | 3321.9         | 3316.7    |             |              |               |
| 3155.5          | 3169.0          | 3207.4        | 3202.3       | 3342.0         | 3648.8    |             |              |               |
| 3546.4          | 3678.1          | 3421.4        | 3740.0       | 3765.3         | 3830.3    |             |              |               |
| 3610.9          | 3879.9          | 3681.0        | 3880.5       | 3911.0         | 3972.2    |             |              |               |
| 4.62653         | 4.36956         | 5.3932        | 5.2462<br>1  | 4.11026        | 4.43162   | 6.9791      | 9.0750<br>4  | 6.9791        |
| 2.53881         | 2.28341         | 2.47946       | 2.3011<br>7  | 2.79933        | 2.35947   | 4.4815<br>4 | 5.0069<br>9  | 4.48154       |
| 10.58346        | 2.2828          | 2.36872       | 1.8595<br>2  | 2.31368        | 1.70761   | 2.7771<br>4 | 3.3388<br>4  | 2.77714       |
| 11.3814182<br>8 | 2.4074043<br>01 | 2.32567<br>39 | 2.1472<br>32 | 2.2984951<br>7 | 2.1863586 | 3.5278<br>7 | 4.0887<br>09 | 3.52786<br>96 |

**Table S3:** Electronic Energies ( $E_o$ ), Zero-point correction (ZPE), Thermal Correction ( $E_T$ ), Thermal Correction to Enthalpy ( $H_T$ ), Free energy correction (G), Entropy (cal/mol-K) of all the species involved in the reactions. All Energies are in Hartree/Particle.

| Species                       | $E_o$        | ZPE      | $E_t$    | $H_t$    | G         | S       |
|-------------------------------|--------------|----------|----------|----------|-----------|---------|
| <b>OH</b>                     | -75.6398532  | 0.008583 | 0.010943 | 0.011887 | -0.008336 | 42.564  |
| <b>CH4</b>                    | -40.4381924  | 0.044959 | 0.047827 | 0.048771 | 0.027653  | 44.447  |
| <b>TS</b>                     | -116.0682119 | 0.051652 | 0.056138 | 0.057082 | 0.026207  | 64.982  |
| <b>H<sub>2</sub>O</b>         | -76.337435   | 0.021649 | 0.024485 | 0.025429 | 0.004017  | 45.065  |
| <b>OH--H<sub>2</sub>O</b>     | -151.9868574 | 0.033329 | 0.038526 | 0.039471 | 0.007279  | 67.754  |
| <b>HCOOH-1</b>                | -189.5061299 | 0.034397 | 0.037552 | 0.038496 | 0.010339  | 59.262  |
| <b>HCOOH-2</b>                | -189.4994147 | 0.034183 | 0.037419 | 0.038363 | 0.010119  | 59.446  |
| <b>OH--<br/>HCOOH-1</b>       | -265.1539342 | 0.046440 | 0.051684 | 0.052628 | 0.017865  | 73.165  |
| <b>OH--<br/>HCOOH-2</b>       | -265.147875  | 0.045242 | 0.051299 | 0.052243 | 0.014376  | 79.698  |
| <b>PRC<sub>FA1</sub></b>      | -305.6004388 | 0.093118 | 0.102579 | 0.103523 | 0.057780  | 96.274  |
| <b>PRC<sub>FA2</sub></b>      | -305.5887088 | 0.091766 | 0.102079 | 0.103023 | 0.054113  | 102.940 |
| <b>TS1<sub>FA-1</sub></b>     | -305.5910306 | 0.089651 | 0.097879 | 0.098823 | 0.055645  | 90.875  |
| <b>TS2<sub>FA-2</sub></b>     | -305.5755387 | 0.087480 | 0.096590 | 0.097535 | 0.050954  | 98.037  |
| <b>Post-PRC<sub>FA1</sub></b> | -305.6244939 | 0.092121 | 0.101926 | 0.102870 | 0.057066  | 96.404  |
| <b>PostPRC<sub>FA2</sub></b>  | -305.6150261 | 0.091651 | 0.101850 | 0.102795 | 0.055977  | 98.537  |
| <b>PRCw-1</b>                 | -192.4249461 | 0.079665 | 0.089049 | 0.089993 | 0.045903  | 92.797  |
| <b>PRCw-2</b>                 | -192.42767   | 0.080489 | 0.089492 | 0.090436 | 0.047255  | 90.882  |
| <b>TSw</b>                    | -192.4150057 | 0.077269 | 0.084859 | 0.085803 | 0.046160  | 83.437  |
| <b>Post-PRCw</b>              | -192.4496651 | 0.080015 | 0.088987 | 0.089931 | 0.047852  | 88.564  |
| <b>CH<sub>3</sub></b>         | -39.7612982  | 0.029672 | 0.032784 | 0.033728 | 0.009860  | 50.235  |
| <b>Post-RC</b>                | -116.101624  | 0.054062 | 0.060613 | 0.061558 | 0.026044  | 74.744  |

**Table S4:** Calculated unimolecular rate constant ( $k_2$  in  $\text{s}^{-1}$ )

| T<br>(K) | $k_{2(w)}$<br>( $\rightarrow\text{PRC}_w$ )<br>$\rightarrow\text{TS}_w$ | $k_{2(FA-1)}$<br>( $\text{PRC}_{FA-1}$ )<br>$\rightarrow\text{TS}_{2FA-1}$ | $k_{2(FA-2)}$<br>( $\text{PRC}_{FA-2}$ )<br>$\rightarrow\text{TS}_{2FA-2}$ |
|----------|-------------------------------------------------------------------------|----------------------------------------------------------------------------|----------------------------------------------------------------------------|
| 200      | $8.03 \times 10^5$                                                      | $5.58 \times 10^8$                                                         | $5.66 \times 10^6$                                                         |
| 225      | $2.55 \times 10^6$                                                      | $1.09 \times 10^9$                                                         | $2.60 \times 10^7$                                                         |
| 250      | $5.33 \times 10^6$                                                      | $1.91 \times 10^9$                                                         | $8.72 \times 10^7$                                                         |
| 275      | $1.22 \times 10^7$                                                      | $3.10 \times 10^9$                                                         | $2.34 \times 10^8$                                                         |
| 300      | $2.45 \times 10^7$                                                      | $4.68 \times 10^9$                                                         | $5.32 \times 10^8$                                                         |
| 325      | $4.45 \times 10^7$                                                      | $6.69 \times 10^9$                                                         | $1.06 \times 10^9$                                                         |
| 350      | $7.47 \times 10^7$                                                      | $9.13 \times 10^9$                                                         | $1.92 \times 10^9$                                                         |
| 375      | $1.17 \times 10^8$                                                      | $1.20 \times 10^{10}$                                                      | $3.22 \times 10^9$                                                         |
| 400      | $1.74 \times 10^8$                                                      | $1.53 \times 10^{10}$                                                      | $5.04 \times 10^9$                                                         |

**Table S5:** Calculated equilibrium constants ( $K_{eq}$  in  $\text{cm}^3 \text{ molecule}^{-1}$ ) for the formation of two-body complexes.

| T(K) | $K_{eq(3)}$<br>(OH+ H <sub>2</sub> O<br>$\rightarrow\text{RC}_{2w}$ ) | $K_{eq(1)}$<br>(OH+ FA-1<br>$\rightarrow\text{RC}_{4FA1}$ ) | $K_{eq(2)}$<br>(OH+ FA-2<br>$\rightarrow\text{RC}_{4FA2}$ ) |
|------|-----------------------------------------------------------------------|-------------------------------------------------------------|-------------------------------------------------------------|
| 200  | $1.38 \times 10^{-19}$                                                | $7.00 \times 10^{-22}$                                      | $9.06 \times 10^{-21}$                                      |
| 225  | $4.23 \times 10^{-20}$                                                | $3.12 \times 10^{-22}$                                      | $3.03 \times 10^{-21}$                                      |
| 250  | $1.66 \times 10^{-20}$                                                | $1.67 \times 10^{-22}$                                      | $1.28 \times 10^{-21}$                                      |
| 275  | $7.80 \times 10^{-21}$                                                | $1.01 \times 10^{-22}$                                      | $6.41 \times 10^{-22}$                                      |
| 300  | $4.19 \times 10^{-21}$<br>$5.7 \times 10^{-21}$                       | $6.74 \times 10^{-23}$                                      | $3.64 \times 10^{-22}$                                      |
| 325  | $2.50 \times 10^{-21}$                                                | $4.85 \times 10^{-23}$                                      | $2.28 \times 10^{-22}$                                      |
| 350  | $1.62 \times 10^{-21}$                                                | $3.69 \times 10^{-23}$                                      | $1.54 \times 10^{-22}$                                      |
| 375  | $1.12 \times 10^{-21}$                                                | $2.95 \times 10^{-23}$                                      | $1.11 \times 10^{-22}$                                      |
| 400  | $8.19 \times 10^{-22}$                                                | $2.44 \times 10^{-23}$                                      | $8.40 \times 10^{-23}$                                      |

**Table S6:** Calculated equilibrium constants ( $K_{eq}$  in  $\text{cm}^3 \text{ molecule}^{-1}$ ) for the formation of three-body complex

| T<br>(K) | $K_{eq(A)}$<br>(CH <sub>4</sub> +<br>RC <sub>2w</sub><br>$\rightarrow\text{PRC}_w$ ) | $K_{eq(E)}$<br>(CH <sub>4</sub> +<br>RC <sub>4FA1</sub><br>$\rightarrow\text{PRC}_{FA1}$ ) | $K_{eq(F)}$<br>(CH <sub>4</sub> +<br>RC <sub>4FA2</sub><br>$\rightarrow\text{PRC}_{FA2}$ ) |
|----------|--------------------------------------------------------------------------------------|--------------------------------------------------------------------------------------------|--------------------------------------------------------------------------------------------|
| 200      | $3.75 \times 10^{-20}$                                                               | $1.82 \times 10^{-18}$                                                                     | $3.16 \times 10^{-20}$                                                                     |
| 225      | $1.18 \times 10^{-20}$                                                               | $2.61 \times 10^{-19}$                                                                     | $1.00 \times 10^{-20}$                                                                     |
| 250      | $4.82 \times 10^{-21}$                                                               | $5.64 \times 10^{-20}$                                                                     | $4.13 \times 10^{-21}$                                                                     |
| 275      | $2.37 \times 10^{-21}$                                                               | $1.64 \times 10^{-20}$                                                                     | $2.04 \times 10^{-21}$                                                                     |
| 300      | $1.34 \times 10^{-21}$                                                               | $5.93 \times 10^{-21}$                                                                     | $1.16 \times 10^{-21}$                                                                     |
| 325      | $8.37 \times 10^{-22}$                                                               | $2.54 \times 10^{-21}$                                                                     | $7.33 \times 10^{-22}$                                                                     |
| 350      | $5.69 \times 10^{-22}$                                                               | $1.24 \times 10^{-21}$                                                                     | $5.01 \times 10^{-22}$                                                                     |
| 375      | $4.13 \times 10^{-22}$                                                               | $6.77 \times 10^{-22}$                                                                     | $3.66 \times 10^{-22}$                                                                     |
| 400      | $3.16 \times 10^{-22}$                                                               | $4.01 \times 10^{-22}$                                                                     | $2.81 \times 10^{-22}$                                                                     |

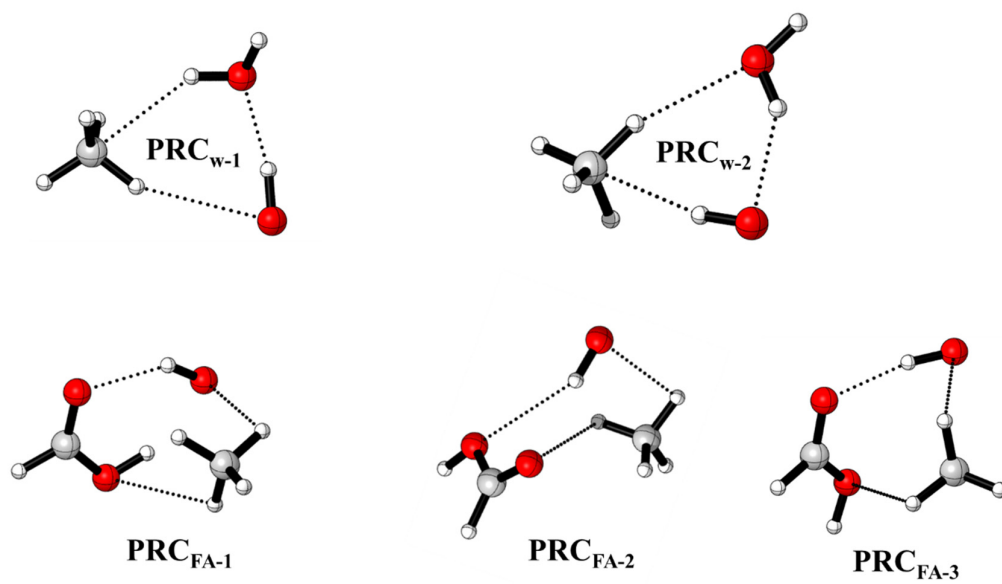

**Figure S1.** Three body complexes for the effect of FA/H<sub>2</sub>O on OH+CH<sub>4</sub> reaction.

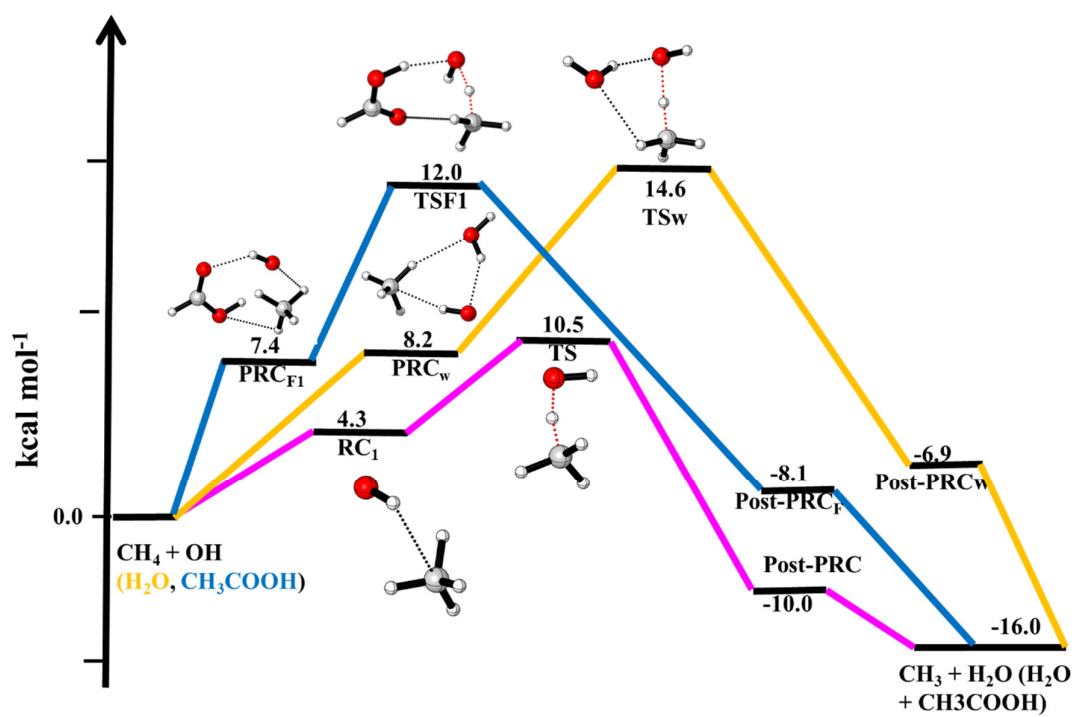

**Figure S2.** Free energy profiles for the  $\text{CH}_4 + \text{OH}$  (—),  $\text{CH}_4 + \text{OH} + \text{H}_2\text{O}$  (—) and  $\text{CH}_4 + \text{OH} + \text{HCOOH}$  (—) reactions.
